# Supplementary material for: Population-based genetic effects for developmental stuttering
Source: PubMed Central journal article supplement — HGG Adv. 2021 Dec 2;3(1):100073. doi: 10.1016/j.xhgg.2021.100073 (PMC8756529; doi:10.1016/j.xhgg.2021.100073), 2021-12-02
Supplement: mmc1.pdf [file mmc1.pdf]

**HGGA, Volume 3**

**Supplemental information**

**Population-based genetic effects**

**for developmental stuttering**

**Hannah G. Polikowsky, Douglas M. Shaw, Lauren E. Petty, Hung-Hsin Chen, Dillon G. Pruett, Jonathon P. Linklater, Kathryn Z. Viljoen, Janet M. Beilby, Heather M. Highland, Brandt Levitt, Christy L. Avery, Kathleen Mullan Harris, Robin M. Jones, Jennifer E. Below, and Shelly Jo Kraft**

| Supp. Table 1. ICD codes used to identify developmental stuttering patients in BioVU |                      |                                                 |
|--------------------------------------------------------------------------------------|----------------------|-------------------------------------------------|
| ICD-9 Code                                                                           | ICD-10 Code          | Definition                                      |
| 315.35                                                                               | F80.81               | Childhood Onset Fluency Disorder                |
| 315.39                                                                               | F80.0, F80.89, F80.9 | Other developmental speech or language disorder |

**Table S1. ICD9/10 Exclusion criteria.** Table depicts ICD codes applied as exclusion criteria for the selection of ancestry- and sex-matched population-based controls for the ISP GWAS of clinically ascertained cases.

| rsID        | CHR | Position  | Effect Allele | Other Allele    | EA     | INFO  | BETA   | SE    | OR    | P VALUE  | Nearest gene    | Location            |
|-------------|-----|-----------|---------------|-----------------|--------|-------|--------|-------|-------|----------|-----------------|---------------------|
| NA          | 2   | 78519487  | T             | TA              | 0.343  | 0.991 | -0.270 | 0.051 | 0.763 | 1.08E-07 | NA              | NA                  |
| NA          | 4   | 172506840 | C             | CTACTC<br>ATGAG | 0.067  | 0.682 | 0.587  | 0.116 | 1.80  | 4.23E-07 | <i>GALNTL6</i>  | intronic            |
| rs61859204  | 10  | 43660815  | T             | C               | 0.095  | 0.989 | 0.407  | 0.081 | 1.50  | 5.02E-07 | NA              | NA                  |
| rs7197535   | 16  | 24382574  | G             | A               | 0.1144 | 0.982 | 0.370  | 0.074 | 1.45  | 6.20E-07 | <i>CACNG3</i>   | 20kb<br>downstream  |
| rs10994295  | 10  | 46040909  | C             | T               | 0.499  | 0.487 | 0.418  | 0.084 | 1.512 | 6.42E-07 | <i>MSMB</i>     | intronic            |
| rs1045247   | 1   | 226994874 | A             | G               | 0.180  | 0.985 | 0.302  | 0.062 | 1.352 | 1.05E-06 | <i>CDC42BPA</i> | exonic              |
| rs6427338   | 1   | 156953690 | C             | A               | 0.037  | 0.705 | 0.730  | 0.150 | 2.08  | 1.13E-06 | <i>ARHGEF11</i> | intronic            |
| rs904872    | 15  | 97520985  | T             | C               | 0.071  | 0.402 | 0.715  | 0.148 | 2.04  | 1.35E-06 | NA              | NA                  |
| rs144946999 | 2   | 25505099  | G             | A               | 0.012  | 0.972 | 1.07   | 0.223 | 2.90  | 1.71E-06 | <i>DTNB</i>     | intronic            |
| rs10817935  | 9   | 116790777 | T             | C               | 0.234  | 0.971 | -0.278 | 0.059 | 0.758 | 2.35E-06 | <i>ASTN2</i>    | intronic            |
| rs2774497   | 13  | 103286349 | C             | T               | 0.086  | 0.971 | -0.413 | 0.089 | 0.661 | 3.19E-06 | <i>SLC10A2</i>  | 220kb<br>downstream |
| rs182338960 | 14  | 85216697  | G             | A               | 0.021  | 0.916 | 0.817  | 0.176 | 2.265 | 3.24E-06 | <i>SNORD3P3</i> | 55kb<br>upstream    |
| rs9531835   | 13  | 31400237  | C             | G               | 0.188  | 0.890 | 0.301  | 0.065 | 1.351 | 3.42E-06 | <i>B3GLCT</i>   | 68kb<br>downstream  |
| rs34711070  | 4   | 182770462 | C             | G               | 0.482  | 0.888 | 0.239  | 0.052 | 1.27  | 3.61E-06 | <i>TENM3</i>    | intronic            |
| rs74434153  | 4   | 33128906  | C             | T               | 0.045  | 0.882 | 0.556  | 0.121 | 1.74  | 4.01E-06 | NA              | NA                  |
| rs13183297  | 5   | 1200770   | G             | C               | 0.232  | 0.917 | 0.275  | 0.060 | 1.32  | 4.19E-06 | <i>SLC6A19</i>  | 1kb upstream        |
| rs12613469  | 2   | 131920387 | A             | C               | 0.146  | 0.936 | -0.342 | 0.074 | 0.710 | 4.30E-06 | <i>CDRT15P3</i> | 119kb<br>downstream |
| rs549259468 | 4   | 118420869 | G             | C               | 0.012  | 0.970 | 1.01   | 0.221 | 2.75  | 4.90E-06 | <i>PRSS12</i>   | 68kb<br>downstream  |
| rs71571436  | 6   | 166126728 | T             | C               | 0.030  | 0.985 | -0.703 | 0.154 | 0.495 | 4.91E-06 | <i>TBXT</i>     | 31kb<br>upstream    |

**Table S3. Top hits from ISP genome wide association study.** Table includes nineteen sentinel variants from loci with  $p < 5 \times 10^{-6}$ . NA (not available) reported for variants where the nearest protein-coding gene was more than 250kb away (either upstream or downstream according to UCSC reference genome browser). Location indicates approximate position from nearest gene. Base-pair positions listed according to human genome reference build 38.

| rsID         | CHR | Position  | Effect Allele | Other Allele                                     | EAF   | INFO  | BETA   | SE    | OR    | P VALUE  | Nearest gene  | Location         |
|--------------|-----|-----------|---------------|--------------------------------------------------|-------|-------|--------|-------|-------|----------|---------------|------------------|
| rs76016608   | 21  | 36661116  | T             | G                                                | 0.082 | 0.937 | 0.530  | 0.102 | 1.70  | 2.08E-07 | <i>RUNX1</i>  | 240kb downstream |
| rs77605856   | 5   | 63572220  | G             | T                                                | 0.062 | 0.508 | 0.799  | 0.154 | 2.22  | 2.18E-07 | <i>RNF180</i> | intronic         |
| rs113284510  | 3   | 8725187   | T             | C                                                | 0.079 | 0.478 | -0.787 | 0.152 | 0.455 | 2.23E-07 | <i>SSUH2</i>  | intronic         |
| NA           | 12  | 29759906  | G             | GCC                                              | 0.380 | 0.970 | 0.288  | 0.056 | 1.33  | 2.27E-07 | <i>TMTC1</i>  | intronic         |
| rs61936749   | 12  | 95114780  | T             | C                                                | 0.081 | 0.876 | 0.551  | 0.107 | 1.74  | 2.35E-07 | <i>TMCC3</i>  | 70kb downstream  |
| rs57878561   | 2   | 52386461  | C             | G                                                | 0.087 | 0.724 | 0.565  | 0.114 | 1.76  | 6.79E-07 | NA            | NA               |
| rs3098526    | 15  | 27840730  | C             | T                                                | 0.461 | 0.862 | -0.289 | 0.058 | 0.749 | 7.27E-07 | <i>GABRG3</i> | 62kb downstream  |
| rs11193269   | 10  | 108998421 | T             | A                                                | 0.080 | 0.872 | 0.523  | 0.106 | 1.69  | 7.69E-07 | <i>SORCS1</i> | 74kb downstream  |
| rs58528263   | 4   | 17107477  | G             | T                                                | 0.226 | 0.991 | 0.329  | 0.067 | 1.39  | 9.13E-07 | <i>LDB2</i>   | 207kb downstream |
| rs1491167301 | 1   | 173738919 | C             | CA                                               | 0.257 | 0.456 | 0.447  | 0.091 | 1.56  | 9.19E-07 | <i>KLHL20</i> | intronic         |
| rs915383     | 14  | 101651628 | T             | C                                                | 0.067 | 0.563 | 0.687  | 0.142 | 1.99  | 1.23E-06 | NA            | NA               |
| rs73479865   | 9   | 25555477  | C             | T                                                | 0.026 | 0.864 | 0.818  | 0.173 | 2.27  | 2.12E-06 | <i>TUSC1</i>  | 121kb upstream   |
| rs73859317   | 3   | 106215273 | G             | C                                                | 0.031 | 0.896 | 0.770  | 0.163 | 2.16  | 2.29E-06 | NA            | NA               |
| rs78908171   | 8   | 70551392  | A             | G                                                | 0.114 | 0.806 | 0.452  | 0.096 | 1.57  | 2.49E-06 | <i>SULF1</i>  | intronic         |
| rs6824924    | 4   | 38761762  | G             | T                                                | 0.109 | 0.543 | -0.556 | 0.119 | 0.573 | 2.92E-06 | <i>TLR10</i>  | 12kb upstream    |
| rs35164368   | 9   | 100375608 | G             | A                                                | 0.046 | 0.875 | 0.648  | 0.139 | 1.92  | 3.17E-06 | <i>TSTD2</i>  | intronic         |
| rs2070394    | 21  | 35239405  | T             | A                                                | 0.324 | 0.979 | 0.272  | 0.059 | 1.31  | 3.69E-06 | <i>ITSN1</i>  | intronic         |
| rs151193015  | 1   | 173441135 | C             | G                                                | 0.034 | 0.647 | 0.865  | 0.188 | 2.38  | 4.07E-06 | NA            | NA               |
| rs28380337   | 5   | 153785436 | T             | G                                                | 0.064 | 0.910 | 0.560  | 0.122 | 1.75  | 4.31E-06 | NA            | NA               |
| rs564196491  | 11  | 58977318  | G             | del(TATGT<br>GTGTGCG<br>TGTGTGT<br>GTGTGTG<br>T) | 0.388 | 0.640 | -0.312 | 0.068 | 0.732 | 4.35E-06 | <i>MPEG1</i>  | 3' UTR           |
| rs3786426    | 18  | 9792798   | T             | C                                                | 0.144 | 0.544 | 0.466  | 0.101 | 1.59  | 4.40E-06 | <i>RAB31</i>  | intronic         |
| NA           | 7   | 125074119 | A             | AT                                               | 0.098 | 0.746 | 0.480  | 0.105 | 1.62  | 4.49E-06 | NA            | NA               |
| rs2868820    | 4   | 84811756  | A             | G                                                | 0.478 | 0.750 | 0.282  | 0.062 | 1.33  | 4.86E-06 | NA            | NA               |
| rs2433647    | 12  | 23018273  | G             | A                                                | 0.341 | 0.980 | 0.265  | 0.058 | 1.30  | 4.90E-06 | <i>ETNK1</i>  | 175kb downstream |

**Table S4. Top hits from Add Health stuttering genome wide association study.** Table includes twenty-four sentinel variants from loci with  $p < 5 \times 10^{-6}$ . NA (not available) reported for variants where the nearest protein-coding gene was more than 250kb away (either upstream or downstream according to UCSC reference genome browser). Location indicates approximate position from nearest gene. Base-pair positions listed according to human genome reference build 37.

| Study                               | Gene           | Chr:bp (Gene)                 | Population Architecture                                                                                                                                                           | N SNPs | Lowest pval in our study | effN tests | Adj pval | Rsid       | Chr:pos (Rsid) | Effect Allele | Other Allele | EAF   | Zscore |
|-------------------------------------|----------------|-------------------------------|-----------------------------------------------------------------------------------------------------------------------------------------------------------------------------------|--------|--------------------------|------------|----------|------------|----------------|---------------|--------------|-------|--------|
| Lan, et al. 2009 <sup>31</sup>      | <i>DRD2</i>    | chr11:113,409,605-113,475,398 | Case-control (gender-matched controls) association study focusing specifically on dopaminergic gene haplotypes and allele frequencies among SNPs in the Han Chinese population    | 167    | 0.034                    | 22         | 0.748    | rs12805897 | 11:113453571   | A             | G            | 0.063 | 2.12   |
| Kang, et al. 2010 <sup>32</sup>     | <i>GNPTAB</i>  | chr12:101,745,499-101,830,959 | 77 unrelated Pakistani individuals that stutter plus unrelated cases from 46 Pakistani families (see Suresh et al.), 270 affected unrelated individuals from N. America & England | 199    | 0.013                    | 14         | 0.182    | rs55764824 | 12:101788264   | T             | C            | 0.087 | -2.48  |
|                                     | <i>GNPTG</i>   | chr16:1,351,931-1,364,113     |                                                                                                                                                                                   | 19     | 0.015                    | 7          | 0.105    | rs761057   | 16:1354725     | T             | C            | 0.099 | 2.43   |
|                                     | <i>NAGPA</i>   | chr16:5,024,844-5,034,141     |                                                                                                                                                                                   | 28     | 0.022                    | 6          | 0.132    | rs34742205 | 16:5030890     | A             | G            | 0.105 | -2.29  |
| Raza, et al. 2015 <sup>33</sup>     | <i>AP4E1</i>   | chr15:50,908,683-51,005,895   | Camroonian family + probands from Cameroon, Pakistani, and N. America                                                                                                             | 224    | 0.126                    | 9          | 1        | rs79933276 | 15:50928230    | T             | A            | 0.024 | -1.53  |
| Mohamadi, et al. 2017 <sup>30</sup> | <i>CYP17A1</i> | chr10:102,830,531-102,837,472 | Case-control (age and ethnic background matched) study of Kurdish population aged 3-9 years from western Iran                                                                     | 17     | 0.025                    | 4          | 0.1      | rs4919687  | 10:102835491   | A             | G            | 0.27  | -2.24  |

**Table S5. Summary of genes implicated in developmental stuttering from the literature.** Reported p value represents the lowest p value identified in the gene found within our meta-GWAS. Adjusted p value (Adj pval) represents the Bonferroni corrected p value after adjusting for the effective number of tests (effN tests). Chromosome and base-pair positions listed according to human genome reference build 38.

| Region                   | Gene          | RCP   | # of SNPs | Lead SNP          | Max SCP | Tissue                              |
|--------------------------|---------------|-------|-----------|-------------------|---------|-------------------------------------|
| chr2:111630529-112630529 | <i>FBLN7</i>  | 0.092 | 10        | <b>rs10779884</b> | 0.030   | Muscle Skeletal                     |
| chr2:111630529-112630529 | <i>FBLN7</i>  | 0.063 | 13        | rs4849044         | 0.025   | Muscle Skeletal                     |
| chr2:111630529-112630529 | <i>FBLN7</i>  | 0.062 | 16        | <b>rs10779884</b> | 0.025   | Esophagus Mucosa                    |
| chr2:111630529-112630529 | <i>FBLN7</i>  | 0.060 | 14        | rs6707397         | 0.023   | Brain Hypothalamus                  |
| chr2:60940832-61940832   | NA            | 0.052 | 7         | rs74181273        | 0.046   | Esophagus Muscularis                |
| chr2:60940832-61940832   | NA            | 0.051 | 5         | rs74181273        | 0.033   | Esophagus Gastroesophageal Junction |
| chr2:97986856-98986856   | <i>INPP4A</i> | 0.050 | 4         | rs140321250       | 0.018   | Esophagus Mucosa                    |

**Table S6. Identified genomic regions that showed the highest probability of a colocalized association signal between *cis*-eQTLs in GTEx\_v8 and stuttering meta-analysis hits.** A region is listed if its regional colocalization probability (RCP) is  $\geq 0.05$ . Max SCP (SNP-level colocalization probability) indicates the maximum probability reported for each SNP identified in the indicated region. The affected protein-coding gene is listed; "NA"

indicates no identified protein-coding gene. The tested tissue indicated in the tissue column. SNP in bold was identified as a top hit in the meta-analysis. Region positions refer to human genome reference build 38.

| Genes                                                                            | Gene Count | Adj pval | pval     | Tissue                | Biological Process                                                                                                                                                                                                                                                    |
|----------------------------------------------------------------------------------|------------|----------|----------|-----------------------|-----------------------------------------------------------------------------------------------------------------------------------------------------------------------------------------------------------------------------------------------------------------------|
| <b>SSUH2</b> /LRRTM1/ <b>FBLN7</b> /ELOVL2/RELN/MAB21L2/SEMA6D                   | 7          | 6.63E-03 | 5.10E-04 | Minor Salivary Gland  | Extracellular matrix and structure organization, cell adhesion, anatomical structure development, developmental process, nervous system development, ossification, neurogenesis, cell migration, bone morphogenesis                                                   |
| <b>PSAT1</b> /SMURF1/PDE6D/ELOVL2/ERBB4/RASSF8/NFATC2/ZNF496/DCTN4/C4orf19/RLBP1 | 11         | 0.123    | 0.012    | Brain Cortex          | organic acid catabolic process, carboxylic acid catabolic process, small molecule catabolic process, monocarboxylic acid catabolic process, fatty acid catabolic process, organic acid metabolic process, small molecule metabolic process, oxoacid metabolic process |
| QDPR/PLLP/TMCC3                                                                  | 3          | 0.137    | 0.019    | Cerebellar Hemisphere | ensheathment of neurons, axon ensheathment, myelination, neurogenesis, oligodendrocyte differentiation, glial cell differentiation, nervous system development, generation of neurons                                                                                 |
| <b>USP34</b> /RELN/C14orf132/EXOSC6/FRY                                          | 5          | 0.137    | 0.025    | Cerebellar Hemisphere | DNA binding, transcription regulator activity, metal ion binding, nucleic acid binding                                                                                                                                                                                |
| DSEL/QDPR/PLLP/TMCC3/EFNA1                                                       | 5          | 0.167    | 0.033    | Brain Cortex          | ensheathment of neurons, axon ensheathment, myelination, neurogenesis, oligodendrocyte differentiation, glial cell differentiation, nervous system development, generation of neurons                                                                                 |
| QDPR/SLC48A1/PLLP/TMCC3                                                          | 4          | 0.178    | 0.023    | Cerebellum            | ensheathment of neurons, axon ensheathment, myelination, neurogenesis, oligodendrocyte differentiation, glial cell differentiation, nervous system development, generation of neurons                                                                                 |
| <b>INPP4A</b> / <b>USP34</b> /TBC1D30/RELN/UNC13C/C14orf132/FRY/SACM1L           | 8          | 0.178    | 0.040    | Cerebellum            | DNA binding, transcription regulator activity, metal ion binding, nucleic acid binding                                                                                                                                                                                |
| DSEL/QDPR/CDC42BPA/SEMA6D/PLLP/TMCC3                                             | 6          | 0.199    | 0.017    | Caudate basal ganglia | ensheathment of neurons, axon ensheathment, myelination, neurogenesis,                                                                                                                                                                                                |

|                                                |   |       |       |                                       |                                                                                                                                                                                                                                                                      |
|------------------------------------------------|---|-------|-------|---------------------------------------|----------------------------------------------------------------------------------------------------------------------------------------------------------------------------------------------------------------------------------------------------------------------|
|                                                |   |       |       |                                       | oligodendrocyte differentiation, glial cell differentiation, nervous system development, generation of neurons                                                                                                                                                       |
| <b>GPATCH2/NCAM2/ERBB4/RPAP3/ SACM1L</b>       | 5 | 0.224 | 0.022 | Brain putamen basal ganglia           | mitochondrial ATP synthesis coupled electron transport, ATP synthesis coupled electron transport, aerobic electron transport chain, respiratory electron transport chain, oxidative phosphorylation                                                                  |
| <i>UNC50/RPAP3/SACM1L</i>                      | 3 | 0.327 | 0.025 | Brain cervical spinal cord            | sterol biosynthetic process, secondary alcohol biosynthetic process, cholesterol biosynthetic process, secondary alcohol metabolic process, alcohol biosynthetic process, cholesterol metabolic process, central nervous system development sterol metabolic process |
| <b>GPATCH2/TLE3/CDC42BPA</b>                   | 3 | 0.345 | 0.049 | Brain substantia nigra                | regulation of histamine secretion by mast cell                                                                                                                                                                                                                       |
| <b>SSUH2/RPAP3/ZNF496/SLC48A1/ DCTN4/WDR27</b> | 6 | 0.367 | 0.049 | Amygdala                              | nitrogen compound metabolic process, cellular metabolic process                                                                                                                                                                                                      |
| <i>QDPR/DTX4/CDC42BPA/PLLP /TMCC3</i>          | 5 | 0.415 | 0.048 | Brain nucleus accumbens basal ganglia | ensheathment of neurons, axon ensheathment, myelination, neurogenesis, oligodendrocyte differentiation, glial cell differentiation, nervous system development, generation of neurons                                                                                |

**Table S7. Module enrichment analysis performed using eMAGMA.** The Genes column indicates the gene set enriched in our Add Health and ISP meta-analysis and gene count indicates the number of genes in each module. Genes highlighted in bold were identified as a nearest gene for a meta-analysis top hit (see Table 2). Module enrichment reported for any gene tissue-specific analysis with a raw  $p < 0.05$ , “Adj pval” indicates the FDR corrected p value. A competitive gene pathway analysis was performed on tissue-specific gene co-expression modules using g:Profiler (<https://biit.cs.ut.ee/gprofiler/gost>). The biological process column describes biological pathways of tissue-specific modules enriched with stuttering gene-based signals.

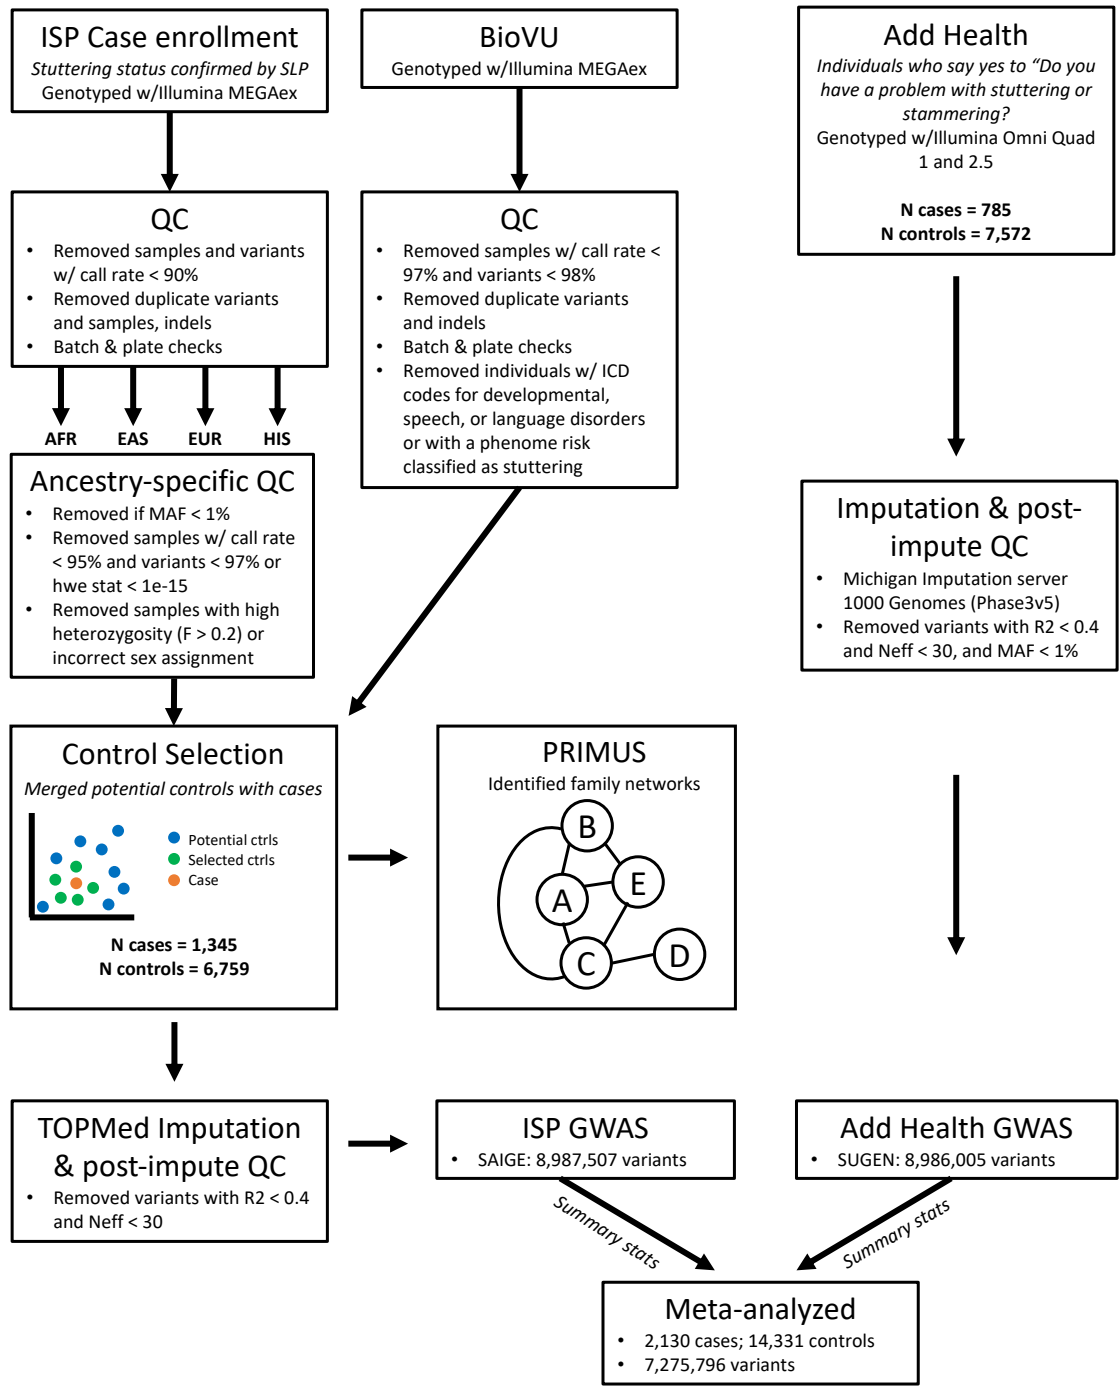

**Figure S1. Experimental workflow.** Diagram indicates the flow and sequence of applied quality control filters for each analyzed dataset (ISP cases and controls and Add Health samples). Details for each step are depicted in the methods section.

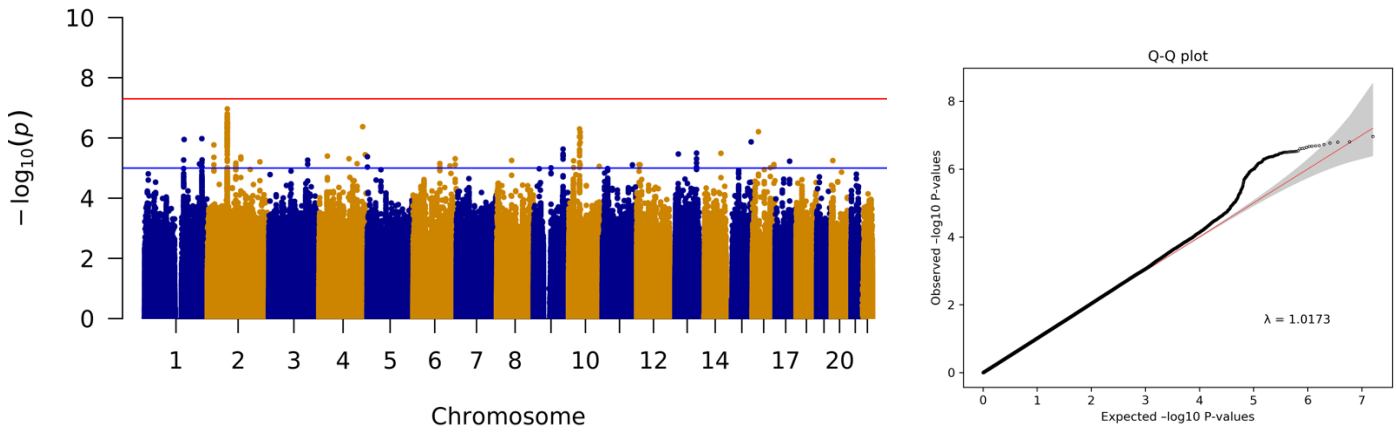

**Figure S2. Manhattan and qq-plot of stuttering genome-wide association results in ISP.** Analysis included 1,345 cases and 6,759 ancestry and sex-matched controls for 8,987,507 variants imputed across autosomes using the TOPMed reference. No loci reached genome-wide significance (red line  $p < 5 \times 10^{-8}$ ). Nineteen loci reached suggestive genome-wide significance (blue line  $p < 5 \times 10^{-6}$ ).

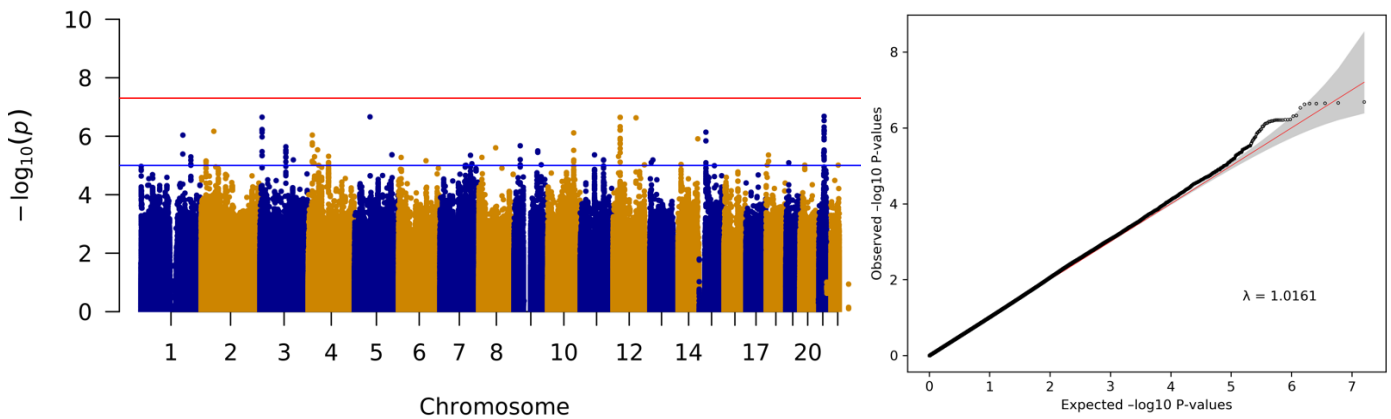

**Figure S3. Manhattan and qq-plot of stuttering genome-wide association results in Add Health.** Analysis included 785 cases and 7,572 controls for 8,986,005 variants imputed across autosomes using the 1000 Genomes Reference. No loci reached genome-wide significance (red line  $p < 5 \times 10^{-8}$ ); twenty-four loci reached suggestive genome-wide significance (blue line  $p < 5 \times 10^{-6}$ ).



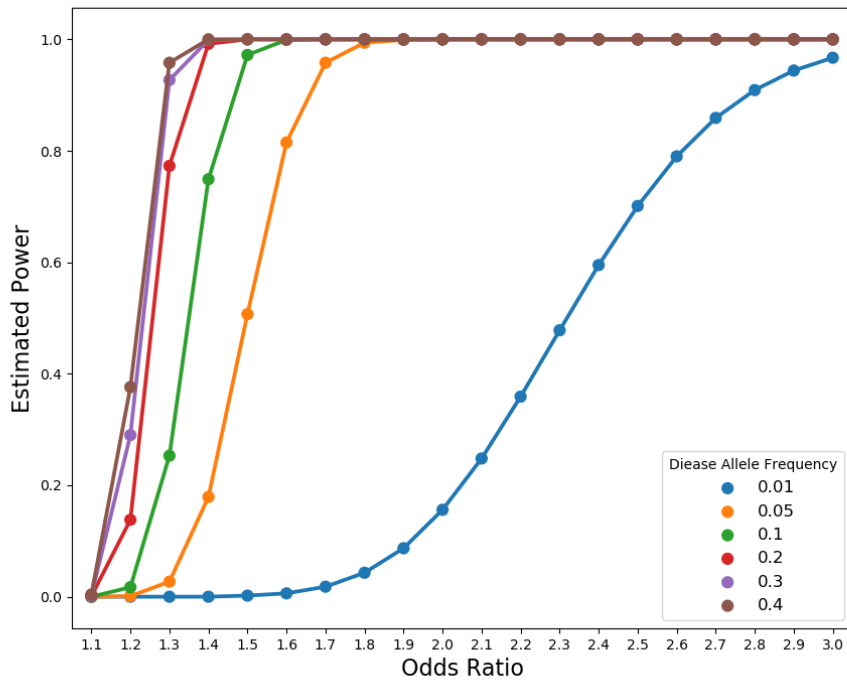

**Figure S4. Power to detect significant developmental stuttering associations in meta-analysis.** Power calculation included 2,130 cases and 14,331 controls and assumed a two-sided hypothesis test at  $p < 5 \times 10^{-8}$ , an additive model, and a developmental stuttering population prevalence of 1%. Each color represents estimated power for the disease allele frequency indicated in the figure legend.
